# Supplementary material
Source: PubMed Central journal article supplement (PMC3180731)
Supplement: tableS1.pdf [file tableS1.pdf]

1 **Suppl Table 1. Transcripts more abundantly expressed in HSD junctional zone (182 transcripts)**

| GenBank   | Symbol              | Description                                                              | Chromosome   | HSD/BN |
|-----------|---------------------|--------------------------------------------------------------------------|--------------|--------|
| AI172274  | <i>Echdc2</i>       | enoyl Coenzyme A hydratase domain containing 2                           | 5            | 76.09  |
| AI764437  | <i>LOC683295</i>    | similar to keratin complex 2, basic, gene 6a                             | 7            | 47.03  |
| BF291140  | <i>LOC100363112</i> | Aa2-296-like                                                             | 3            | 31.42  |
| BI286411  | <i>Krt5</i>         | keratin 5                                                                | 7            | 18.11  |
| AI556222  | <i>Rab43</i>        | RAB43, member RAS oncogene family                                        | 4            | 17.89  |
| NM_012503 | <i>Asgr1</i>        | asialoglycoprotein receptor 1                                            | 10           | 15.71  |
| BI282965  | <i>RT1-Aw2</i>      | RT1 class Ib, locus Aw2                                                  | 20           | 15.58  |
| AI500753  | <i>Acer2</i>        | alkaline ceramidase 2                                                    | 5            | 14.54  |
| AI406342  | <i>Spock1</i>       | sparc/osteonectin, cwcv and kazal-like domains proteoglycan (testican) 1 | 17           | 13.88  |
| AI059078  | <i>RGD1309969</i>   | similar to RIKEN cDNA 2600010E01                                         | 3            | 13.53  |
| AA866443  | <i>Prss35</i>       | protease, serine, 35                                                     | 8            | 13.45  |
| BE106664  | <i>Col19a1</i>      | collagen, typeXIX, alpha 1                                               | 9            | 12.88  |
| BG670819  | <i>Ppp1r1c</i>      | protein phosphatase 1, regulatory (inhibitor) subunit 1C                 | 3            | 12.71  |
| AI598401  | ---                 | Not annotated                                                            | 20           | 12.13  |
| AI009944  | <i>Txk</i>          | TXK tyrosine kinase                                                      | 14           | 10.81  |
| BG377340  | <i>Pex11b</i>       | peroxisomal biogenesis factor 11 beta                                    | 2            | 9.15   |
| AA799328  | <i>Fam111a</i>      | family with sequence similarity 111, member A                            | 1            | 8.61   |
| AW531272  | ---                 | Not annotated                                                            | Not assigned | 8.60   |
| AA926318  | <i>Prcp</i>         | prolylcarboxypeptidase (angiotensinase C)                                | 1            | 8.02   |
| BI287300  | <i>MGC72973</i>     | beta-glo                                                                 | 1            | 7.86   |
| BF282112  | <i>Fubp3</i>        | far upstream element binding protein 3                                   | 3            | 7.70   |
| AI599463  | <i>Dguok</i>        | deoxyguanosine kinase                                                    | 4            | 7.57   |
| NM_020100 | <i>Ramp3</i>        | receptor (G protein-coupled) activity modifying protein 3                | 14           | 7.22   |
| BI282860  | <i>LOC685652</i>    | similar to keratin 6L                                                    | 7            | 7.07   |
| AI029745  | <i>Chodl</i>        | chondrolectin                                                            | 11           | 7.06   |
| BF284634  | <i>Efemp1</i>       | EGF-containing fibulin-like extracellular matrix protein 1               | 14           | 6.75   |
| AA998007  | ---                 | Not annotated                                                            | 7            | 6.65   |
| BI296619  | <i>Fbxl13</i>       | F-box and leucine-rich repeat protein 13                                 | 4            | 6.45   |
| BF401629  | <i>Stat6</i>        | signal transducer and activator of transcription 6                       | 7            | 6.05   |
| AA996717  | <i>Snhg8</i>        | small nucleolar RNA host gene (non-protein coding) 8                     | 16           | 6.01   |
| AI599250  | <i>Larp4</i>        | La ribonucleoprotein domain family, member 4                             | 4            | 5.87   |
| AI176481  | <i>LOC684841</i>    | similar to CG31613-PA                                                    | 17           | 5.72   |
| BG372437  | <i>CmbI</i>         | carboxymethylenebutenolidase homolog (Pseudomonas)                       | 2            | 5.70   |
| BE097085  | ---                 | Not annotated                                                            | Not assigned | 5.70   |
| AI712541  | <i>Dhfr</i>         | dihydrofolate reductase                                                  | 2            | 5.67   |
| BM391896  | <i>Zfp185</i>       | similar to mouse zinc finger protein 185                                 | X            | 5.42   |
| AA923974  | <i>Rab14</i>        | RAB14, member RAS oncogene                                               | 3            | 5.42   |
| AI502703  | <i>Krt23</i>        | keratin 23 (histone deacetylase inducible)                               | 10           | 5.30   |

|           |                     |                                                                  |    |      |
|-----------|---------------------|------------------------------------------------------------------|----|------|
| AI407006  | <i>Prtfdc1</i>      | phosphoribosyl transferase domain containing 1                   | 17 | 5.20 |
| BF401203  | ---                 | Not annotated                                                    | 5  | 5.10 |
| BI277565  | <i>Cfp</i>          | complement factor properdin                                      | X  | 4.98 |
| BI299500  | ---                 | Not annotated                                                    | X  | 4.94 |
| AI232784  | <i>Bdh2</i>         | 3-hydroxybutyrate dehydrogenase, type 2                          | 2  | 4.93 |
| AA818815  | <i>LOC100174910</i> | glutaredoxin-like protein                                        | 18 | 4.93 |
| BI290114  | <i>Rnf190</i>       | ring finger protein 190                                          | 10 | 4.91 |
| AI317837  | <i>Ccdc49</i>       | coiled-coil domain containing 49                                 | 10 | 4.89 |
| AI030026  | <i>Prr5l</i>        | proline rich 5 like                                              | 3  | 4.86 |
| AA819268  | <i>Pik3r1</i>       | phosphatidylinositol 3-kinase, regulatory subunit, polypeptide 1 | 2  | 4.83 |
| BE099215  | <i>Tbc1d9b</i>      | TBC1 domain family, member 9B                                    | 10 | 4.78 |
| BI285860  | <i>Prcp</i>         | prolylcarboxypeptidase (angiotensinase C)                        | 1  | 4.74 |
| BI286411  | <i>Krt5</i>         | keratin 5                                                        | 7  | 4.67 |
| AW915083  | <i>Cdc14a</i>       | CDC14 cell division cycle 14 homolog A ( <i>S. cerevisiae</i> )  | 2  | 4.65 |
| NM_053908 | <i>Ptpn6</i>        | protein tyrosine phosphatase, non-receptor type 6                | 4  | 4.59 |
| AI045966  | <i>Ube2e2</i>       | ubiquitin-conjugating enzyme E2E 2                               | 15 | 4.53 |
| AA900400  | <i>Wtap</i>         | Wilms tumor 1 associated protein                                 | 1  | 4.49 |
| AI071826  | <i>Ano9</i>         | anoctamin 9                                                      | 1  | 4.42 |
| BI288131  | ---                 | Not annotated                                                    | 8  | 4.40 |
| NM_013191 | <i>S100b</i>        | S100 calcium binding protein B                                   | 20 | 4.38 |
| AI178814  | <i>LOC499089</i>    | similar to pregnancy-specific glycoprotein 25                    | 1  | 4.36 |
| AI172585  | <i>Fbln1</i>        | fibulin 1                                                        | 7  | 4.35 |
| AI103040  | <i>Zfp189</i>       | similar to mouse zinc finger protein 189                         | 12 | 4.32 |
| BM386767  | <i>RGD1560559</i>   | similar to RIKEN cDNA 2310042E22                                 | 11 | 4.29 |
| NM_133514 | <i>Mmp10</i>        | matrix metalloproteinase 10                                      | 8  | 4.25 |
| AI556056  | <i>Cr2</i>          | complement receptor 2                                            | 13 | 4.18 |
| AW528468  | <i>RGD1561852</i>   | similar to Protein C20orf29                                      | 3  | 4.15 |
| AB076401  | <i>Fat3</i>         | FAT tumor suppressor homolog 3 ( <i>Drosophila</i> )             | 8  | 4.08 |
| AI044813  | <i>Umps</i>         | uridine monophosphate synthetase                                 | 11 | 4.06 |
| AI113325  | <i>Sesn3</i>        | sestrin 3                                                        | 8  | 4.06 |
| NM_031010 | <i>Alox15</i>       | arachidonate 15-lipoxygenase                                     | 10 | 3.92 |
| AI511405  | <i>Tiparp</i>       | TCDD-inducible poly(ADP-ribose) polymerase                       | 2  | 3.90 |
| AA875055  | <i>Cox15</i>        | COX15 homolog, cytochrome c oxidase assembly protein (yeast)     | 1  | 3.79 |
| NM_012883 | <i>Sult1e1</i>      | sulfotransferase family 1E, estrogen-preferring, member 1        | 14 | 3.77 |
| AA858564  | <i>Sox2</i>         | SRY (sex determining region Y)-box 2                             | 2  | 3.77 |
| BM389786  | <i>Marvel2</i>      | MARVEL domain containing 2                                       | 2  | 3.77 |
| BI292687  | <i>Spred1</i>       | sprouty-related, EVH1 domain containing 1                        | 3  | 3.74 |
| NM_031349 | <i>Aplnr</i>        | apelin receptor                                                  | 3  | 3.69 |
| BF417576  | <i>Sprr2e</i>       | similar to mouse small proline-rich protein 2E                   | 2  | 3.67 |
| BI276554  | ---                 | Not annotated                                                    | 16 | 3.65 |

|           |                   |                                                                                          |              |      |
|-----------|-------------------|------------------------------------------------------------------------------------------|--------------|------|
| BF549971  | ---               | Not annotated                                                                            | Not assigned | 3.48 |
| BE105494  | <i>Parp8</i>      | poly (ADP-ribose) polymerase family, member 8                                            | 2            | 3.44 |
| BM387041  | <i>Acer2</i>      | alkaline ceramidase 2                                                                    | 5            | 3.39 |
| BE111796  | <i>rCG_43687</i>  | hypothetical protein LOC688459                                                           | 9            | 3.38 |
| H31625    | <i>Frmd5</i>      | FERM domain containing 5                                                                 | 3            | 3.36 |
| AW252232  | ---               | Not annotated                                                                            | 1            | 3.30 |
| NM_053433 | <i>Fmo3</i>       | flavin containing monooxygenase 3                                                        | 13           | 3.29 |
| AI231460  | <i>Usp46</i>      | ubiquitin specific peptidase 46                                                          | 14           | 3.25 |
| BI293548  | <i>Clic2</i>      | chloride intracellular channel 2                                                         | 20           | 3.25 |
| AI102821  | <i>Eif2s1</i>     | eukaryotic translation initiation factor 2, subunit 1 alpha                              | 6            | 3.24 |
| BI289767  | <i>Itgal</i>      | integrin alpha L                                                                         | 1            | 3.22 |
| AA955352  | ---               | Not annotated                                                                            | 4            | 3.20 |
| AF029241  | <i>H2-T23</i>     | histocompatibility 2, T region locus 23                                                  | 20           | 3.18 |
| AW921084  | <i>Cirbp</i>      | cold inducible RNA binding protein                                                       | 7            | 3.17 |
| BF404929  | ---               | Not annotated                                                                            | 8            | 3.11 |
| AA892565  | <i>Ttc8</i>       | tetratricopeptide repeat domain 8                                                        | 6            | 3.08 |
| AW532330  | ---               | Not annotated                                                                            | 8            | 3.07 |
| AF140346  | <i>Sfrp4</i>      | secreted frizzled-related protein 4                                                      | 17           | 3.04 |
| BE098506  | <i>Hsd17b11</i>   | hydroxysteroid (17-beta) dehydrogenase 11                                                | 14           | 3.02 |
| AA800192  | ---               | Not annotated                                                                            | Not assigned | 3.01 |
| AF230096  | <i>Miox</i>       | myo-inositol oxygenase                                                                   | 7            | 2.95 |
| BF291169  | <i>Shisa3</i>     | shisa homolog 3 ( <i>Xenopus laevis</i> )                                                | 14           | 2.90 |
| BI290883  | <i>Dzip11</i>     | DAZ interacting protein 1-like                                                           | 8            | 2.87 |
| BG667110  | ---               | Not annotated                                                                            | 17           | 2.86 |
| NM_022631 | <i>Wnt5a</i>      | wingless-type MMTV integration site family, member 5A                                    | 16           | 2.85 |
| M24024    | <i>RT1-Aw2</i>    | RT1 class Ib, locus Aw2                                                                  | 20           | 2.83 |
| BG381381  | <i>Zfp873</i>     | similar to mouse zinc finger protein 873                                                 | 7            | 2.83 |
| BE098045  | <i>Adar</i>       | adenosine deaminase, RNA-specific                                                        | 2            | 2.77 |
| AI233135  | <i>Sirt3</i>      | sirtuin (silent mating type information regulation 2 homolog) 3 ( <i>S. cerevisiae</i> ) | 1            | 2.77 |
| AI232806  | <i>Zfp422</i>     | zinc finger protein 422                                                                  | 4            | 2.77 |
| BG377335  | <i>Tctex1d2</i>   | Tctex1 domain containing 2                                                               | 11           | 2.75 |
| AI502367  | <i>Gna11</i>      | guanine nucleotide binding protein, alpha 11                                             | 7            | 2.73 |
| AI231461  | <i>E nox1</i>     | ecto-NOX disulfide-thiol exchanger 1                                                     | 15           | 2.72 |
| BE119143  | <i>LOC306346</i>  | similar to KIAA1683                                                                      | 16           | 2.71 |
| NM_130400 | <i>Dhfr</i>       | dihydrofolate reductase                                                                  | 2            | 2.71 |
| BI295150  | <i>Ckap2</i>      | cytoskeleton associated protein 2                                                        | 16           | 2.68 |
| AI716200  | <i>LOC290595</i>  | hypothetical gene supported by AF152002                                                  | 16           | 2.68 |
| AA894167  | <i>Lpar2</i>      | lysophosphatidic acid receptor 2                                                         | 16           | 2.67 |
| BF398245  | <i>Trps1</i>      | trichorhinophalangeal syndrome 1 homolog (human)                                         | 7            | 2.65 |
| BE097786  | <i>Igsf8</i>      | immunoglobulin superfamily, member 8                                                     | 13           | 2.64 |
| AI709444  | <i>LOC681383</i>  | similar to Protein C10orf11 homolog                                                      | 15           | 2.64 |
| AI178157  | <i>RGD1560812</i> | RGD1560812                                                                               | 6            | 2.57 |
| AI454769  | ---               | Not annotated                                                                            | 2            | 2.57 |
| BI288816  | <i>Rragd</i>      | Ras-related GTP binding D                                                                | 5            | 2.57 |

|           |                   |                                                                            |    |      |
|-----------|-------------------|----------------------------------------------------------------------------|----|------|
| BM387458  | <i>LOC690073</i>  | similar to neuroblastoma-amplified protein                                 | 6  | 2.56 |
| BI300589  | <i>Mfap3</i>      | microfibrillar-associated protein 3                                        | 10 | 2.56 |
| BG372018  | <i>Tulp1</i>      | tubby like protein 1                                                       | 20 | 2.55 |
| AI409460  | <i>Tmem88</i>     | transmembrane protein 88                                                   | 10 | 2.55 |
| BG381387  | ---               | Not annotated                                                              | 2  | 2.55 |
| BF390797  | <i>Jakmip1</i>    | janus kinase and microtubule interacting protein 1                         | 14 | 2.54 |
| BI288870  | <i>LOC680199</i>  | hypothetical protein LOC680199                                             | 16 | 2.53 |
| AA997590  | <i>Ogn</i>        | osteoglycin                                                                | 17 | 2.51 |
| AI411594  | <i>Plscr2</i>     | phospholipid scramblase 2                                                  | 8  | 2.49 |
| AA819349  | <i>Sfxn1</i>      | sideroflexin 1                                                             | 17 | 2.48 |
| AF087696  | <i>Mpp2</i>       | membrane protein, palmitoylated 2 (MAGUK p55 subfamily member 2)           | 10 | 2.47 |
| AI104736  | <i>LOC682404</i>  | similar to CG12929-PA                                                      | 5  | 2.47 |
| BI281874  | <i>Klhl23</i>     | kelch-like 23 (Drosophila)                                                 | 3  | 2.46 |
| AI412925  | <i>Pbx4</i>       | pre-B-cell leukemia homeobox 4                                             | 16 | 2.45 |
| BF549971  | ---               | Not annotated                                                              | X  | 2.44 |
| BF565151  | <i>Ssbp2</i>      | single-stranded DNA binding protein 2                                      | 2  | 2.42 |
| AI638971  | <i>Ocln</i>       | occludin                                                                   | 2  | 2.42 |
| BF282115  | <i>Mfap3</i>      | microfibrillar-associated protein 3                                        | 10 | 2.41 |
| BG664969  | <i>Usp31</i>      | ubiquitin specific peptidase 31                                            | 1  | 2.41 |
| AI229202  | ---               | Not annotated                                                              | 16 | 2.38 |
| BF399429  | <i>Ankrd42</i>    | ankyrin repeat domain 42                                                   | 1  | 2.38 |
| BI276097  | <i>Amn</i>        | amniotless homolog (mouse)                                                 | 6  | 2.35 |
| NM_023022 | <i>Rhag</i>       | Rh-associated glycoprotein                                                 | 9  | 2.34 |
| BF287591  | <i>Tmem131</i>    | transmembrane protein 131                                                  | 9  | 2.34 |
| BG380473  | <i>Mfap3</i>      | microfibrillar-associated protein 3                                        | 10 | 2.32 |
| AB019693  | <i>Keg1</i>       | kidney expressed gene 1                                                    | 1  | 2.30 |
| AW253379  | <i>Harbi1</i>     | harbinger transposase derived 1                                            | 3  | 2.25 |
| BI294864  | <i>Slc10a4</i>    | solute carrier family 10 (sodium/bile acid cotransporter family), member 4 | 14 | 2.24 |
| BI289088  | <i>Hsf2bp</i>     | heat shock transcription factor 2 binding protein                          | 20 | 2.24 |
| AI045724  | <i>Fbxo32</i>     | F-box protein 32                                                           | 7  | 2.24 |
| AI556643  | <i>LOC311352</i>  | similar to Adenosine deaminase CG11994-PA                                  | 3  | 2.23 |
| AA848942  | <i>Rcc2</i>       | regulator of chromosome condensation 2                                     | 5  | 2.23 |
| AI009623  | <i>Rpp25</i>      | ribonuclease P 25 subunit (human)                                          | 8  | 2.22 |
| BI284886  | <i>Ctsql2</i>     | cathepsin Q-like 2                                                         | 17 | 2.22 |
| BE104114  | <i>Klhl23</i>     | kelch-like 23 (Drosophila)                                                 | 3  | 2.21 |
| BF387640  | <i>Nrf1</i>       | nuclear respiratory factor 1                                               | 4  | 2.21 |
| AA899909  | <i>Rbm14-Rbm4</i> | RBM14-RBM4 readthrough                                                     | 1  | 2.19 |
| AI716211  | <i>MGC105649</i>  | hypothetical LOC302884                                                     | 3  | 2.18 |
| AW520496  | <i>Exoc3l</i>     | exocyst complex component 3-like                                           | 19 | 2.16 |
| BI275261  | <i>Tnr</i>        | tenascin R                                                                 | 13 | 2.16 |
| AI500830  | <i>RT1-Aw2</i>    | RT1 class Ib, locus Aw2                                                    | 20 | 2.15 |
| AI060133  | <i>Peli3</i>      | pellino 3                                                                  | 1  | 2.15 |
| BF420086  | <i>Sgtb</i>       | small glutamine-rich tetratricopeptide repeat (TPR)-containing, beta       | 2  | 2.14 |
| AI236521  | <i>LOC691849</i>  | hypothetical protein LOC691849                                             | 8  | 2.14 |
| M16347    | <i>Asgr2</i>      | asialoglycoprotein receptor 2                                              | 10 | 2.13 |
| AI071835  | ---               | Not annotated                                                              | 7  | 2.13 |

|           |                   |                                                              |    |      |
|-----------|-------------------|--------------------------------------------------------------|----|------|
| BI294907  | <i>Ncoa3</i>      | nuclear receptor coactivator 3                               | 3  | 2.13 |
| BI290895  | <i>Slc43a1</i>    | solute carrier family 43, member 1                           | 3  | 2.13 |
| AI575121  | <i>RGD1306932</i> | similar to CG9117-PA                                         | 12 | 2.10 |
| BE120895  | <i>Tmem35</i>     | transmembrane protein 35                                     | X  | 2.10 |
| AI232524  | <i>RGD1310475</i> | similar to RIKEN cDNA 0610010D20                             | 1  | 2.10 |
| AI502661  | <i>Pccb</i>       | propionyl coenzyme A carboxylase, beta polypeptide           | 8  | 2.09 |
| AI230845  | <i>Rassf1</i>     | Ras association (RalGDS/AF-6) domain family member 1         | 8  | 2.09 |
| NM_017210 | <i>Dio3</i>       | deiodinase, iodothyronine, type III                          | 6  | 2.09 |
| AI073247  | <i>Irak1bp1</i>   | interleukin-1 receptor-associated kinase 1 binding protein 1 | 8  | 2.08 |
| BM392291  | <i>Rab30</i>      | RAB30, member RAS oncogene family                            | 1  | 2.07 |
| BF419074  | ---               | Not annotated                                                | 19 | 2.05 |
| AI237408  | <i>Letm2</i>      | leucine zipper-EF-hand containing transmembrane protein 2    | 16 | 2.03 |
| NM_017079 | <i>Cd1d1</i>      | CD1d1 molecule                                               | 2  | 2.02 |
| BF556357  | <i>Slc33a1</i>    | solute carrier family 33 (acetyl-CoA transporter), member 1  | 2  | 2.01 |
