# Supplementary material
Source: PubMed Central journal article supplement (PMC3180731)
Supplement: tableS2.pdf [file tableS2.pdf]

1 **Suppl Table 2. Transcripts more abundantly expressed in BN junctional zone (171 transcripts)**

| GenBank   | Symbol            | Description                                             | Chromosome | BN/HSD |
|-----------|-------------------|---------------------------------------------------------|------------|--------|
| NM_021598 | <i>Mcpt8</i>      | mast cell protease 8                                    | 15         | 25.39  |
| BE108856  | <i>Syt13</i>      | synaptotagmin-like 3                                    | 1          | 13.73  |
| AF068268  | <i>Oas1b</i>      | 2-5 oligoadenylate synthetase 1B                        | 12         | 10.67  |
| NM_031327 | <i>Cyr61</i>      | cysteine-rich, angiogenic inducer, 61                   | 2          | 9.87   |
| BM384373  | ---               | Not annotated                                           | 11         | 9.74   |
| BI275447  | <i>Flnb</i>       | filamin, beta                                           | 15         | 9.39   |
| BE107978  | <i>Mapt</i>       | microtubule-associated protein tau                      | 10         | 8.12   |
| BE098686  | <i>LOC687813</i>  | similar to Tnf receptor-associated factor 1             | 3          | 8.01   |
| AW527533  | <i>Phactr2</i>    | Phosphate and actin regulator 2                         | 1          | 7.84   |
| BF394136  | <i>Npas3</i>      | Neuronal PAS domain protein 3                           | 6          | 7.62   |
| M10072    | <i>Ptprc</i>      | protein tyrosine phosphatase, receptor type, C          | 13         | 7.12   |
| AI146105  | <i>RGD1563912</i> | RGD1563912                                              | 3          | 7.05   |
| AI045590  | <i>Pdia5</i>      | protein disulfide isomerase family A, member 5          | 11         | 6.62   |
| BG379188  | <i>Siglec5</i>    | sialic acid binding Ig-like lectin 5                    | 1          | 6.37   |
| BE112135  | <i>Fto</i>        | fat mass and obesity associated                         | 19         | 5.98   |
| BF414312  | <i>Mef2c</i>      | Myocyte enhancer factor 2C                              | 2          | 5.4    |
| BF410484  | ---               | Not annotated                                           | 18         | 5.34   |
| BF392600  | <i>Ank1</i>       | ankyrin 1, erythrocytic                                 | 16         | 5.27   |
| NM_031055 | <i>Mmp9</i>       | matrix metalloproteinase 9                              | 3          | 5.2    |
| BI291884  | <i>Pcdh24</i>     | protocadherin 24                                        | 17         | 5.18   |
| BF410404  | <i>Syn3</i>       | synapsin III                                            | 7          | 4.97   |
| NM_012531 | <i>Comt</i>       | catechol-O-methyltransferase                            | 11         | 4.83   |
| U18772    | <i>Nptx1</i>      | neuronal pentraxin 1                                    | 10         | 4.73   |
| AW528743  | <i>RT1-Ba</i>     | RT1 class II, locus Ba                                  | 20         | 4.59   |
| AA964419  | <i>Capzb</i>      | capping protein (actin filament) muscle Z-line, beta    | 5          | 4.56   |
| X92069    | <i>P2rx5</i>      | purinergic receptor P2X, ligand-gated ion channel, 5    | 10         | 4.56   |
| AW528743  | <i>RT1-Ba</i>     | RT1 class II, locus Ba                                  | 20         | 4.45   |
| NM_012728 | <i>Glp1r</i>      | glucagon-like peptide 1 receptor                        | 20         | 4.41   |
| AW524694  | <i>LOC500591</i>  | similar to calmodulin-binding transcription activator 1 | 5          | 4.11   |
| AF226607  | <i>Prl5a1</i>     | prolactin family 5, subfamily a, member 1               | 17         | 4.11   |
| BE113272  | <i>Fam69c</i>     | Family with sequence similarity 69, member C            | 18         | 4.09   |
| D88250    | <i>C1s</i>        | complement component 1, s subcomponent                  | 4          | 4.04   |
| BE107853  | <i>RGD1309403</i> | similar to hypothetical protein FLJ12661                | 2          | 4.01   |
| BF386740  | ---               | Not annotated                                           | 1          | 3.89   |
| BE349751  | ---               | Not annotated                                           | 1          | 3.89   |
| BF289684  | <i>Usp32</i>      | ubiquitin specific peptidase 32                         | 10         | 3.87   |
| BI279446  | <i>Stap2</i>      | signal transducing adaptor family member 2              | 9          | 3.85   |
| NM_017214 | <i>Rgs4</i>       | regulator of G-protein signaling 4                      | 13         | 3.77   |
| AI177154  | ---               | Not annotated                                           | 16         | 3.75   |
| AI072641  | <i>Foxp1</i>      | forkhead box P1                                         | 4          | 3.69   |
| AA850991  | <i>Vcan</i>       | versican                                                | 2          | 3.66   |
| AB046449  | <i>Ascl3</i>      | achaete-scute complex homolog 3                         | 1          | 3.64   |

|           |                   |                                                                                            |    |      |
|-----------|-------------------|--------------------------------------------------------------------------------------------|----|------|
|           |                   | (Drosophila)                                                                               |    |      |
| NM_022605 | <i>Hpse</i>       | heparanase                                                                                 | 14 | 3.62 |
| NM_012733 | <i>Rbp1</i>       | retinol binding protein 1, cellular                                                        | 8  | 3.61 |
| BI295153  | <i>Znf710</i>     | zinc finger protein 710                                                                    | 1  | 3.5  |
| BF398176  | ---               | Not annotated                                                                              | 6  | 3.46 |
| AI639072  | <i>Anxa3</i>      | annexin A3                                                                                 | 14 | 3.44 |
| AB020480  | <i>Snf1lk</i>     | SNF1-like kinase                                                                           | 20 | 3.34 |
| BM387813  | <i>Rt1-A3</i>     | RT1 class I, A3                                                                            | 20 | 3.3  |
| BF288135  | <i>Prkd3</i>      | protein kinase D3                                                                          | 6  | 3.25 |
| AA945624  | <i>Nqo2</i>       | NAD(P)H dehydrogenase, quinone 2                                                           | 17 | 3.25 |
| U27767    | <i>Rgs4</i>       | regulator of G-protein signaling 4                                                         | 13 | 3.2  |
| AI233246  | <i>Igfbp7</i>     | insulin-like growth factor binding protein 7                                               | 14 | 3.15 |
| NM_033237 | <i>Gal</i>        | galanin prepropeptide                                                                      | 1  | 3.14 |
| AB001382  | <i>Spp1</i>       | secreted phosphoprotein 1                                                                  | 14 | 3.13 |
| BM389311  | <i>RGD1564174</i> | similar to novel protein similar to Tensin Tns                                             | 14 | 3.13 |
| BM387112  | ---               | Not annotated                                                                              | 7  | 3.08 |
| BG371810  | <i>Clic1</i>      | chloride intracellular channel 1                                                           | 20 | 3.04 |
| AA963979  | <i>Galnt1</i>     | UDP-N-acetyl-alpha-D-galactosamine:polypeptide acetylgalactosaminyltransferase (GalNAc-T1) | 18 | 2.9  |
| BI294271  | <i>Stox2</i>      | storkhead box 2                                                                            | 16 | 2.89 |
| BF552873  | <i>Agtr2</i>      | angiotensin II receptor, type 2                                                            | X  | 2.87 |
| NM_052802 | <i>Kap</i>        | kidney androgen regulated protein                                                          | 4  | 2.86 |
| NM_053953 | <i>Il1r2</i>      | interleukin 1 receptor, type II                                                            | 9  | 2.85 |
| BF403369  | <i>Rnf40</i>      | ring finger protein 40                                                                     | 1  | 2.83 |
| BE101703  | <i>Fam78b</i>     | family with sequence similarity 78, member b                                               | 13 | 2.82 |
| M25649    | <i>Oxt</i>        | oxytocin, prepropeptide                                                                    | 3  | 2.78 |
| AA997871  | <i>LOC689165</i>  | hypothetical protein LOC689165                                                             | 17 | 2.78 |
| NM_053687 | <i>Sln3</i>       | schlafen 3                                                                                 | 10 | 2.78 |
| AA955091  | <i>Itga6</i>      | integrin, alpha 6                                                                          | 3  | 2.75 |
| AW526268  | <i>RGD1561817</i> | similar to Traf2 and NCK interacting kinase, splice variant 4                              | 2  | 2.75 |
| NM_031658 | <i>Msln</i>       | mesothelin                                                                                 | 10 | 2.74 |
| BF404786  | <i>Rcan2</i>      | regulator of calcineurin 2                                                                 | 9  | 2.73 |
| AW522148  | ---               | Not annotated                                                                              | 4  | 2.72 |
| NM_053429 | <i>Fgfr3</i>      | fibroblast growth factor receptor 3                                                        | 14 | 2.71 |
| BM387797  | <i>Gsdma1</i>     | gasdermin A1                                                                               | 10 | 2.7  |
| BI278186  | <i>Crct1</i>      | cysteine-rich C-terminal 1                                                                 | 2  | 2.7  |
| BF396597  | <i>Apob</i>       | apolipoprotein B (including Ag(x) antigen)                                                 | 6  | 2.68 |
| BM389265  | <i>Tiam1</i>      | T-cell lymphoma invasion and metastasis 1                                                  | 11 | 2.67 |
| NM_053986 | <i>Myo1b</i>      | myosin Ib                                                                                  | 9  | 2.67 |
| AA900322  | <i>Hcfc2</i>      | host cell factor C2                                                                        | 7  | 2.67 |
| NM_012523 | <i>Cd53</i>       | Cd53 molecule                                                                              | 2  | 2.67 |
| AW140475  | <i>Cugbp2</i>     | CUG triplet repeat, RNA binding protein 2                                                  | 17 | 2.67 |
| AA955786  | <i>Zbtb25</i>     | zinc finger and BTB domain containing 25                                                   | 6  | 2.67 |
| AI709768  | <i>Myo1b</i>      | myosin IB                                                                                  | 9  | 2.66 |
| AA963631  | ---               | Not annotated                                                                              | 7  | 2.62 |
| AI454016  | <i>Lrtm2</i>      | leucine-rich repeats and transmembrane domains 2                                           | 4  | 2.62 |

|           |                   |                                                                |    |      |
|-----------|-------------------|----------------------------------------------------------------|----|------|
| U67915    | <i>Mcpt1</i>      | mast cell protease 1                                           | 15 | 2.61 |
| AI599349  | <i>Srgap3</i>     | slit-robo Rho GTPase activating protein 3                      | 4  | 2.61 |
| X68657    | <i>Mcpt10</i>     | mast cell protease 10                                          | 15 | 2.59 |
| AI412625  | <i>Elmod1</i>     | ELMO/CED-12 domain containing 1                                | 8  | 2.58 |
| BI281086  | <i>Celf2</i>      | CUGBP,Elav-like family member 2                                | 17 | 2.58 |
| BE110753  | <i>Itga6</i>      | integrin, alpha 5                                              | 3  | 2.56 |
| BF403759  | <i>Chdh</i>       | choline dehydrogenase                                          | 16 | 2.55 |
| NM_012870 | <i>Tnfrsf11b</i>  | tumor necrosis factor receptor superfamily, member 11b         | 7  | 2.54 |
| AA894199  | <i>Asap1</i>      | ArfGAP with SH3 domain, ankyrin repeat and PH domain 1         | 7  | 2.53 |
| AB015645  | <i>Trhr2</i>      | thyrotropin releasing hormone receptor 2                       | 19 | 2.53 |
| AW528854  | <i>Grp97</i>      | G protein-coupled receptor 97                                  | 19 | 2.53 |
| X73371    | <i>Fcgr2b</i>     | Fc fragment of IgG, low affinity IIb, receptor (CD32)          | 13 | 2.52 |
| BF390195  | <i>Paqr8</i>      | progesterin and adipoQ receptor family member VIII             | 9  | 2.51 |
| BF287720  | <i>Tcstv1</i>     | 2-cell stage, variable group, member 1                         | 2  | 2.48 |
| AW435429  | <i>Gpsm1</i>      | G-protein signaling modulator 1 (AGS3-like, C. elegans)        | 3  | 2.48 |
| U04733    | <i>Cyp2c23</i>    | cytochrome P450, family 2, subfamily c, polypeptide 23         | 1  | 2.48 |
| NM_019323 | <i>Mcpt9</i>      | mast cell protease 9                                           | 15 | 2.48 |
| AI237082  | <i>Hivep1</i>     | human immunodeficiency virus type I enhancer binding protein 1 | 17 | 2.48 |
| AI104546  | <i>Ptp4a3</i>     | protein tyrosine phosphatase 4a3                               | 7  | 2.46 |
| BE113381  | <i>Trim16</i>     | tripartite motif protein 16                                    | 10 | 2.44 |
| BM391073  | <i>LOC499124</i>  | zinc finger protein 14-like                                    | 1  | 2.44 |
| AI009765  | <i>lfit2</i>      | interferon-induced protein with tetratricopeptide repeats 2    | 1  | 2.43 |
| AW533825  | ---               | Not annotated                                                  | X  | 2.42 |
| U07886    | <i>Pigr</i>       | polymeric immunoglobulin receptor                              | 13 | 2.41 |
| BF288130  | <i>Ptprc</i>      | protein tyrosine phosphatase, receptor type, C                 | 13 | 2.4  |
| BF403932  | ---               | Not annotated                                                  | 9  | 2.4  |
| BF386887  | ---               | Not annotated                                                  | 13 | 2.4  |
| Y00480    | <i>H2-Ea</i>      | histocompatibility 2, class II antigen E alpha                 | 20 | 2.4  |
| NM_013220 | <i>Ankrd1</i>     | ankyrin repeat domain 1 (cardiac muscle)                       | 1  | 2.39 |
| NM_130819 | <i>Dhrs9</i>      | dehydrogenase/reductase (SDR family) member 9                  | 3  | 2.38 |
| NM_138875 | <i>Jund</i>       | Jun D proto-oncogene                                           | 16 | 2.37 |
| BI282028  | <i>RGD1563912</i> | RGD1563912                                                     | 3  | 2.36 |
| NM_032616 | <i>Lsr</i>        | lipolysis stimulated lipoprotein receptor                      | 1  | 2.36 |
| BM390256  | <i>Ddx42</i>      | DEAD (Asp-Glu-Ala-Asp) box polypeptide 42                      | 10 | 2.35 |
| BG671922  | <i>Uox</i>        | urate oxidase                                                  | 2  | 2.34 |
| NM_012621 | <i>Pfkfb1</i>     | 6-phosphofructo-2-kinase/fructose-2,6-biphosphatase 1          | X  | 2.34 |
| AA925482  | <i>Mtmr1</i>      | myotubularin related protein 1                                 | 18 | 2.33 |
| AB020504  | <i>Pmf31</i>      | PMF32 protein                                                  | 2  | 2.33 |
| BG669749  | ---               | Not annotated                                                  | 2  | 2.3  |

|           |                   |                                                                                     |    |      |
|-----------|-------------------|-------------------------------------------------------------------------------------|----|------|
| BF404249  | <i>Znf593</i>     | zinc finger protein 593                                                             | 5  | 2.3  |
| BI293796  | <i>Nckap1l</i>    | NCK associated protein 1 like                                                       | 7  | 2.3  |
| BI296463  | <i>Tpcn2</i>      | two pore segment channel 2                                                          | 1  | 2.29 |
| BM392202  | <i>Plekha6</i>    | pleckstrin homology domain containing, family A member 6                            | 13 | 2.29 |
| AI234819  | <i>Gcnt2</i>      | glucosaminyl (N-acetyl) transferase 2, l-branching enzyme                           | 17 | 2.26 |
| AW522657  | ---               | Not annotated                                                                       | 2  | 2.25 |
| AI137274  | <i>Apc</i>        | adenomatosis polyposis coli                                                         | 18 | 2.22 |
| BF390608  | <i>Prex2</i>      | phosphatidylinositol-3,4,5-trisphosphate-dependent Rac exchange factor 2            | 5  | 2.2  |
| AA859008  | <i>Myo1b</i>      | myosin Ib                                                                           | 9  | 2.18 |
| BM389685  | <i>RGD1565927</i> | similar to 4631422O05Rik protein                                                    | 11 | 2.16 |
| BM391972  | <i>St3gal1</i>    | ST3 beta-galactoside alpha-2,3-sialyltransferase 1                                  | 7  | 2.16 |
| BI296216  | <i>Dixdc1</i>     | DIX domain containing 1                                                             | 8  | 2.16 |
| BI281754  | <i>Glo1</i>       | glyoxalase 1                                                                        | 20 | 2.15 |
| BE109711  | <i>Lcp1</i>       | lymphocyte cytosolic protein 1                                                      | 15 | 2.14 |
| NM_017183 | <i>Il8rb</i>      | interleukin 8 receptor, beta                                                        | 9  | 2.14 |
| AI112776  | <i>Homer2</i>     | homer homolog 2                                                                     | 1  | 2.14 |
| BI296250  | <i>Ptpla</i>      | protein tyrosine phosphatase-like (proline instead of catalytic arginine), member a | 17 | 2.13 |
| AA800908  | <i>Kctd12</i>     | potassium channel tetramerisation domain containing 12                              | 15 | 2.12 |
| BG665929  | <i>Rab6b</i>      | RAB6B, member RAS oncogene family                                                   | 8  | 2.12 |
| NM_031798 | <i>Slc12a2</i>    | solute carrier family 12 (sodium/potassium/chloride transporters), member 2         | 18 | 2.12 |
| AI501394  | <i>Ppib</i>       | peptidyl-prolyl cis-trans isomerase B                                               | 8  | 2.12 |
| U63923    | <i>Txnrd1</i>     | thioredoxin reductase 1                                                             | 7  | 2.11 |
| BF402385  | <i>Magee1</i>     | melanoma antigen, family E, 1                                                       | X  | 2.1  |
| AA818264  | <i>RGD1565457</i> | similar to Rasa4 protein                                                            | 12 | 2.09 |
| NM_024145 | <i>Fgr</i>        | Gardner-Rasheed feline sarcoma viral (v-fgr) oncogene homolog                       | 5  | 2.09 |
| BE120437  | <i>Atp10a</i>     | ATPase, class V, type 10A                                                           | 1  | 2.09 |
| BM386727  | <i>Rdh12</i>      | retinol dehydrogenase 12 (all-trans/9-cis/11-cis)                                   | 6  | 2.08 |
| BF415784  | <i>Pctk2</i>      | PCTAIRE protein kinase 2                                                            | 7  | 2.07 |
| M58040    | <i>Tfrc</i>       | transferrin receptor                                                                | 11 | 2.07 |
| BI274636  | <i>Tcf3</i>       | transcription factor 3                                                              | 4  | 2.06 |
| BG379319  | <i>Tgfb1</i>      | transforming growth factor, beta induced                                            | 17 | 2.06 |
| AW531915  | <i>Pim1</i>       | pim-1 oncogene                                                                      | 20 | 2.06 |
| AB051214  | <i>Trpc6</i>      | transient receptor potential cation channel, subfamily C, member 6                  | 8  | 2.05 |
| AA924649  | <i>Inadl</i>      | InaD-like (Drosophila)                                                              | 5  | 2.05 |
| NM_021909 | <i>Fxyd5</i>      | FXYD domain-containing ion transport regulator 5                                    | 1  | 2.05 |
| BF410474  | <i>Cep164</i>     | centrosomal protein 164kDa                                                          | 8  | 2.04 |
| NM_031614 | <i>Txnrd1</i>     | thioredoxin reductase 1                                                             | 7  | 2.04 |
| L17138    | <i>Hsd3b6</i>     | hydroxy-delta-5-steroid dehydrogenase, 3 beta- and steroid delta-isomerase 6        | 2  | 2.03 |
| NM_080780 | <i>P2rx5</i>      | purinergic receptor P2X, ligand-gated ion                                           | 10 | 2.03 |

|           |                   |                                                                  |    |      |
|-----------|-------------------|------------------------------------------------------------------|----|------|
|           |                   | channel, 5                                                       |    |      |
| BF415212  | <i>Mthfd2l</i>    | methylenetetrahydrofolate dehydrogenase (NADP+ dependent) 2-like | 14 | 2.03 |
| BF289229  | <i>Pla2r1</i>     | phospholipase A2 receptor 1                                      | 3  | 2.03 |
| BI295963  | <i>RGD1305899</i> | similar to Protein C20orf158                                     | 3  | 2.02 |
| AI236601  | <i>Hsph1</i>      | heat shock 105kDa/110kDa protein 1                               | 12 | 2.02 |
| NM_053524 | <i>Nox4</i>       | NADPH oxidase 4                                                  | 1  | 2.01 |
| NM_130423 | <i>Ggt7</i>       | gamma-glutamyltransferase 7                                      | 3  | 2.01 |
| AI103937  | <i>Ntn1</i>       | netrin 1                                                         | 10 | 2.01 |

2  
3
